# Supplementary material for: One-pot hydrothermal synthesis of ZnS–reduced graphene oxide composites with enhanced photocatalytic properties
Source: Royal Society of Chemistry journal article supplement (doi:10.1039/c3ce41423j), 2013-11-21
Supplement: c3ce41423j.pdf [file c3ce41423j.pdf]

# **One-pot hydrothermal synthesis of ZnS-reduced graphene oxide composites with enhanced photocatalytic property**

Yan Feng\*, Ningning Feng, Guoying Zhang, Guixiang Du

Key Laboratory of Inorganic-Organic Hybrid Functional Material Chemistry, Ministry of Education; Tianjin Key Laboratory of Structure and Performance for Functional Molecules; College of Chemistry, Tianjin Normal University, Tianjin, 300387, P. R. China

Supplementary Information List:

Fig.S1 Photographs of ZnS and ZnS-RGO composites with different weight ratios of RGO.

Fig.S2 XPS analysis of survey of GO (a) ZnS-43.6 wt.% RGO composite (b).

Fig.S3 EDX and element content in ZnS-43.6 wt.% RGO composite.

Tab.S1 Atomic percent of elements on the surface of the GO and ZnS-43.6 wt.% RGO composite determined by XPS analysis.

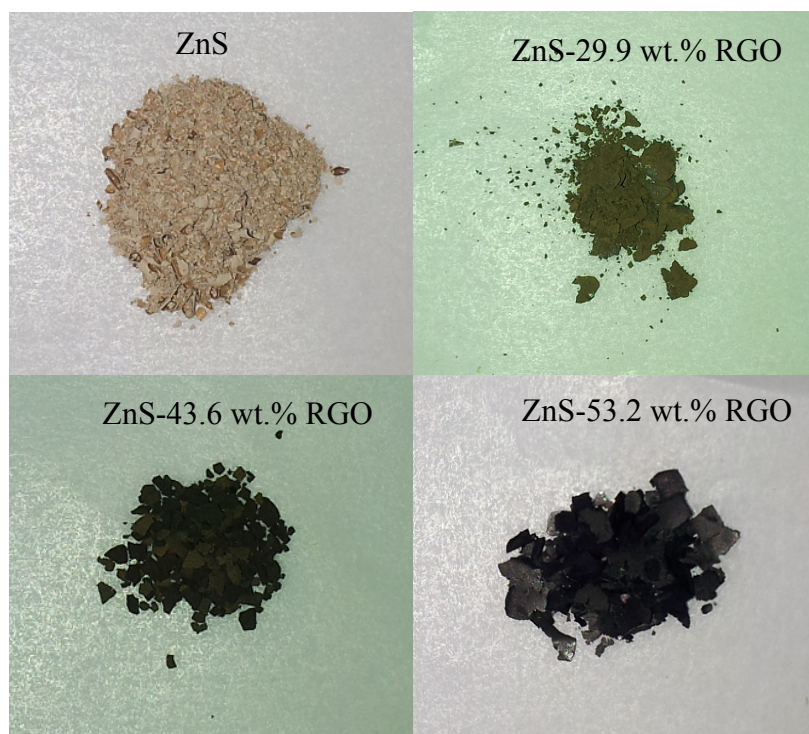

**Fig.S1** Photographs of ZnS and ZnS-RGO composites with different weight ratios of RGO.

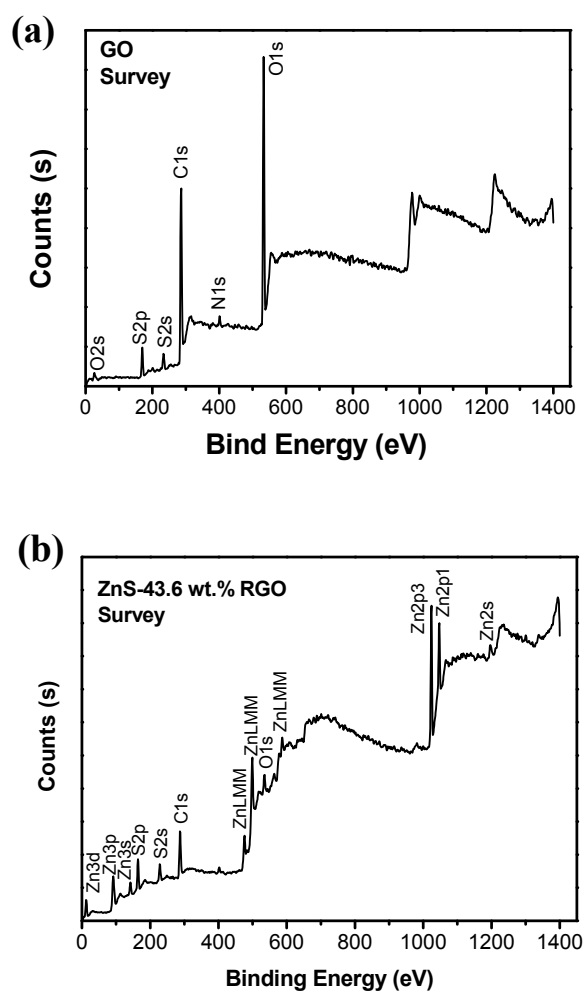

**Fig.S2** XPS analysis of survey of GO (a) ZnS-43.6 wt.% RGO composite (b).

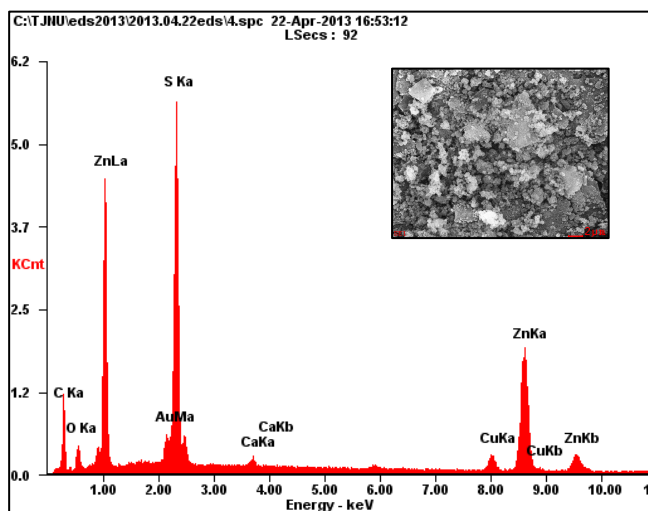

| <i>Element</i> | <i>Wt%</i> | <i>At%</i> |
|----------------|------------|------------|
| <i>CK</i>      | 42.41      | 71.47      |
| <i>OK</i>      | 05.96      | 07.54      |
| <i>AuM</i>     | 04.25      | 00.44      |
| <i>SK</i>      | 17.93      | 11.32      |
| <i>CaK</i>     | 00.51      | 00.26      |
| <i>CuK</i>     | 02.75      | 00.88      |
| <i>ZnK</i>     | 26.20      | 08.11      |
| <i>Matrix</i>  | Correction | ZAF        |

**Fig.S3** EDX and element content in ZnS-43.6 wt.% RGO composite.

**Tab.S1** Atomic percent of elements on the surface of the GO and ZnS-43.6 wt.% RGO composite determined by XPS analysis.

| Sample               | In atomic % from XPS |       |       |      |       |      |
|----------------------|----------------------|-------|-------|------|-------|------|
|                      | C                    | O     | Zn    | N    | S     | Cl   |
| GO                   | 62.64                | 31.94 | 0     | 1.12 | 4.09  | 0.21 |
| ZnS-43.6 wt.%<br>RGO | 60.75                | 8.91  | 11.37 | 4.08 | 14.88 | 0    |
